# Supplementary material for: Alumina decorated TiO2 nanotubes with ordered mesoporous walls as high sensitivity NOx gas sensors at room temperature
Source: Royal Society of Chemistry journal article supplement (doi:10.1039/c3nr01903a), 2013-01-01
Supplement: c3nr01903a.pdf [file c3nr01903a.pdf]

## **Alumina Decorated TiO<sub>2</sub> Nanotubes with Ordered Mesoporous Walls as High Sensitivity of NO<sub>x</sub> Gas Sensors at Room Temperature**

*Renjiang Lü<sup>a,b</sup>, Wei Zhou<sup>a</sup>, Keying Shi<sup>a</sup>, Ying Yang<sup>a,b</sup>, Lei Wang<sup>a</sup>, Kai Pan<sup>a</sup>, Chungui Tian<sup>a</sup>,  
Zhiyu Ren<sup>a</sup>, Honggang Fu<sup>a\*</sup>*

<sup>a</sup> Key Laboratory of Functional Inorganic Material Chemistry, Ministry of Education of the People's Republic of China, Heilongjiang University, Harbin 150080 P. R. China Tel.: +86 451 8660 4330, Fax: +86 451 8667 3647, E-mail: fuhg@vip.sina.com.

<sup>b</sup> College of Chemistry and Chemical Engineering, Qiqihar University, Qiqihar 161006, P. R. China

## Supporting information

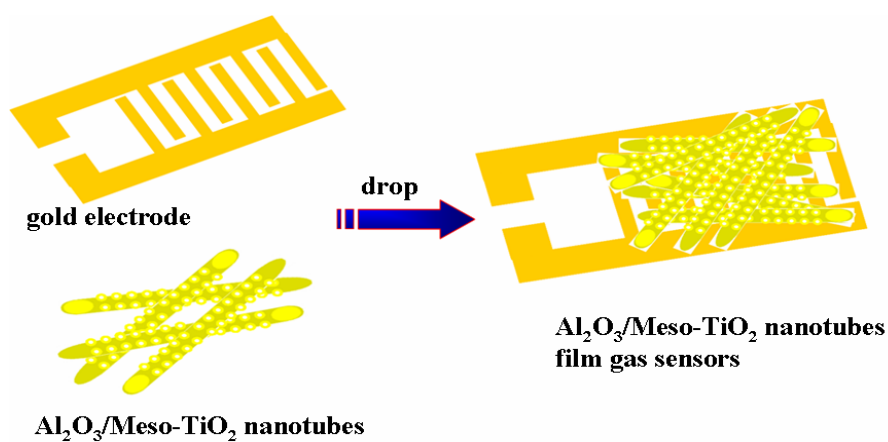

**Fig. S1** Schematic illustration of fabrication for  $\text{Al}_2\text{O}_3/\text{Meso-TiO}_2$  nanotubes film gas sensor.

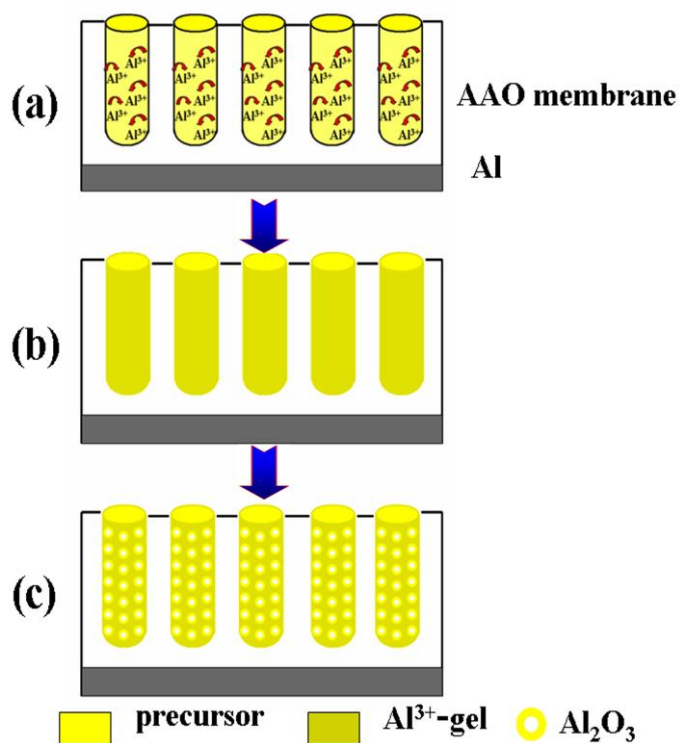

**Fig. S2** Schematic illustration of the synthesis procedure for  $\text{Al}_2\text{O}_3/\text{Meso-TiO}_2$  nanotubes.

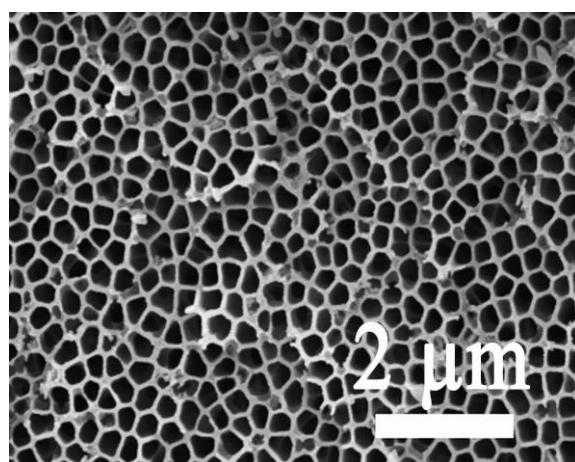

**Fig. S3** SEM image of the prepared AAO membrane with ~200 nm pore diameters (top view).

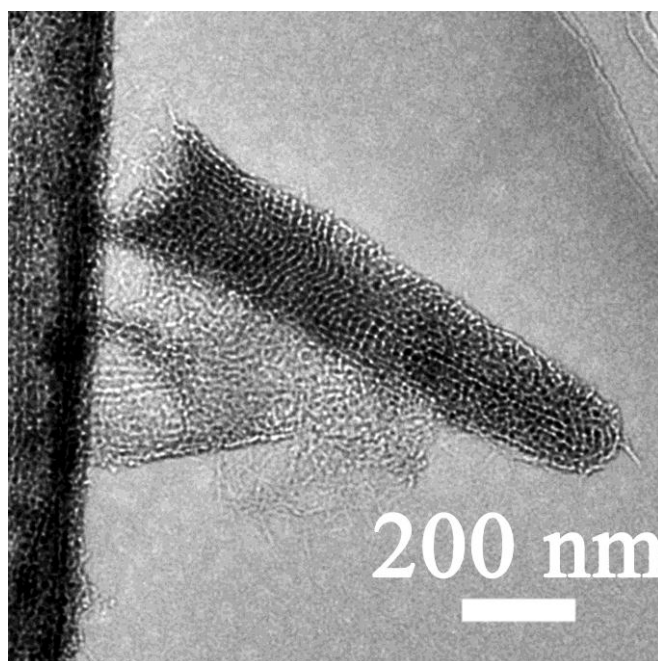

**Fig.S4** TEM image of Al<sub>2</sub>O<sub>3</sub>/Meso-TiO<sub>2</sub> nanotubes sample after removing the AAO template.

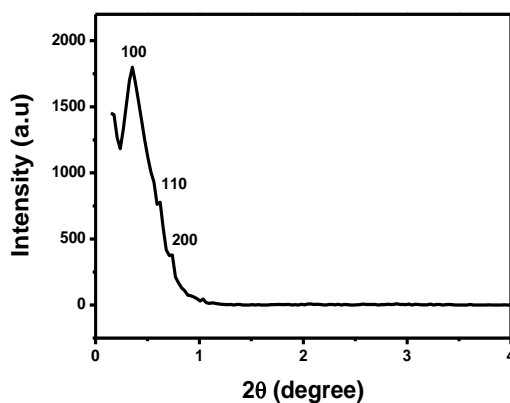

**Fig. S5** The small-angle XRD patterns of the Al<sub>2</sub>O<sub>3</sub>/Meso-TiO<sub>2</sub> nanotubes samples.

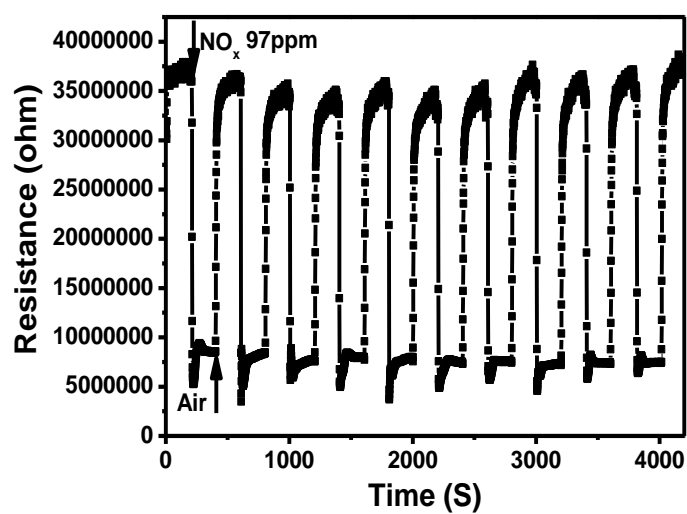

**Fig. S6** Response-recovery curves of fabricated Al<sub>2</sub>O<sub>3</sub>/Meso-TiO<sub>2</sub> nanotubes film gas sensor to NO<sub>x</sub> gas at 97 ppm (10 cycles) in air at room temperature.

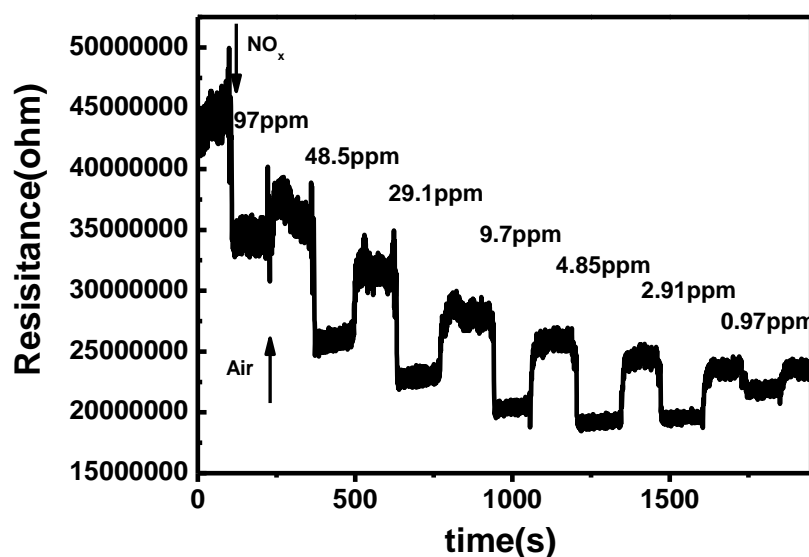

**Fig. S7** Response-recovery curves curves of Meso-TiO<sub>2</sub> nanotubes film gas sensor to various concentrations (0.97-97 ppm) NO<sub>x</sub> gas at room temperature.

**Table S1** Sensitivity, response time and recovery time of fabricated Al<sub>2</sub>O<sub>3</sub>/Meso-TiO<sub>2</sub> nanotubes film gas sensor to various concentrations (0.97-97 ppm) NO<sub>x</sub> gas at room temperature.

| NO <sub>x</sub> Volume<br>Concentration (ppm) | 97    | 48.5  | 29.1  | 9.7   | 4.85  | 2.91  | 0.97  |
|-----------------------------------------------|-------|-------|-------|-------|-------|-------|-------|
| Sensitivity (%)                               | 88.04 | 79.77 | 72.10 | 59.76 | 57.04 | 32.42 | 22.25 |
| Response time (s)                             | 8.0   | 7.3   | 7.3   | 7.3   | 8.6   | 14.0  | 16.0  |
| Recovery time (s)                             | 8.6   | 6.6   | 6.0   | 5.3   | 8.3   | 8.3   | 8.4   |
